# Supplementary material for: A chiral metal–organic framework with polar channels: unique interweaving six-fold helices and high CO2/CH4 separation
Source: Royal Society of Chemistry journal article supplement (doi:10.1039/c6qi00282j), 2016-01-01
Supplement: c6qi00282j1.pdf [file c6qi00282j1.pdf]

## Supporting Information

### **A chiral metal–organic framework with polar channels: unique interweaving six-fold helices and high CO<sub>2</sub>/CH<sub>4</sub> separation**

Bo Liu,<sup>a,b</sup> Hui-Fang Zhou,<sup>b</sup> Lei Hou,<sup>\*b</sup> Zhonghua Zhu,<sup>c</sup> Yao-Yu Wang<sup>b</sup>

<sup>a</sup>*College of Science, Northwest A&F University, Yangling, 712100, P. R. China.*

<sup>b</sup>*Key Laboratory of Synthetic and Natural Functional Molecule Chemistry of the Ministry of Education, Shaanxi Key Laboratory of Physico-Inorganic Chemistry, College of Chemistry & Materials Science, Northwest University, Xi'an 710069, P. R. China.*

*E-mail: lhou2009@nwu.edu.cn*

<sup>c</sup>*School of Chemical Engineering, The University of Queensland, Brisbane 4072, Australia.*

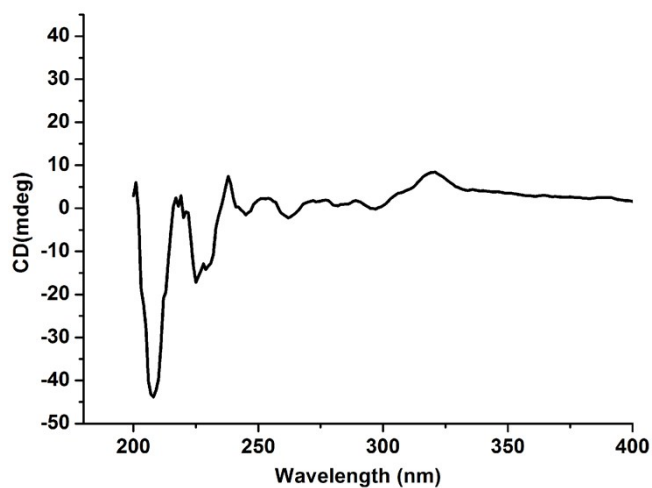

Fig. S1 The solid-state CD spectra for **1**.

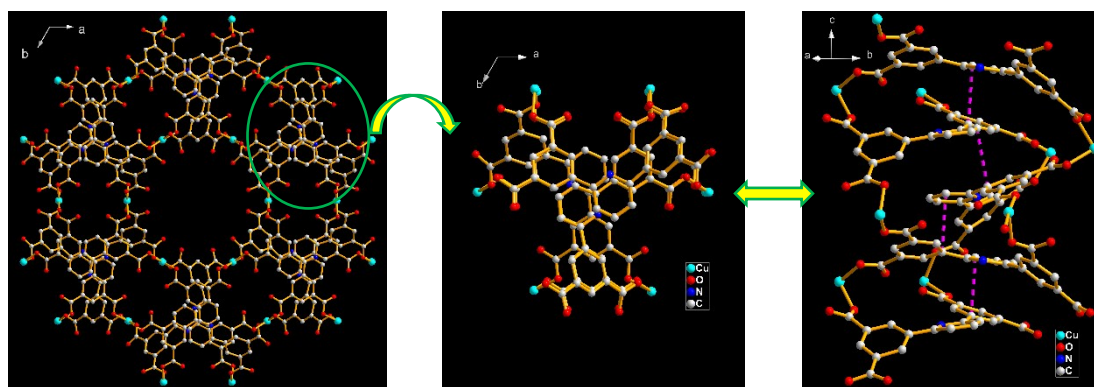

Fig. S2  $\pi \cdots \pi$  stacking in **1**, the vertical distance of adjacent pyridyl ring and isophthalate subunit is 3.367 Å, measured between the atoms of C8 and C10.

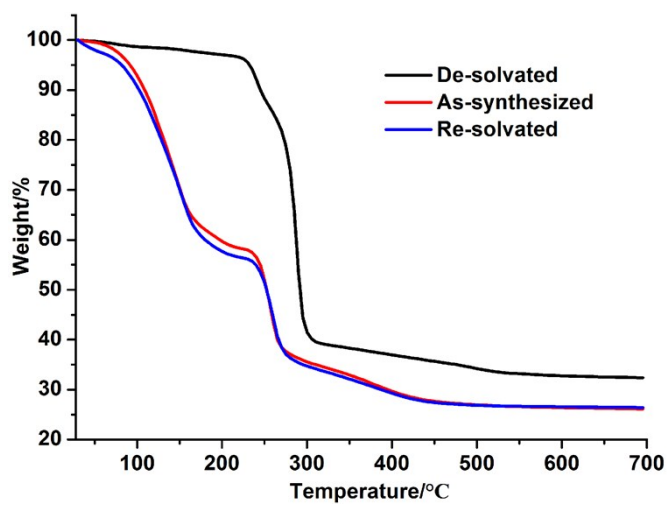

Fig. S3 TGA curves for as-synthesized, desolvated, and resolvated samples of **1**.

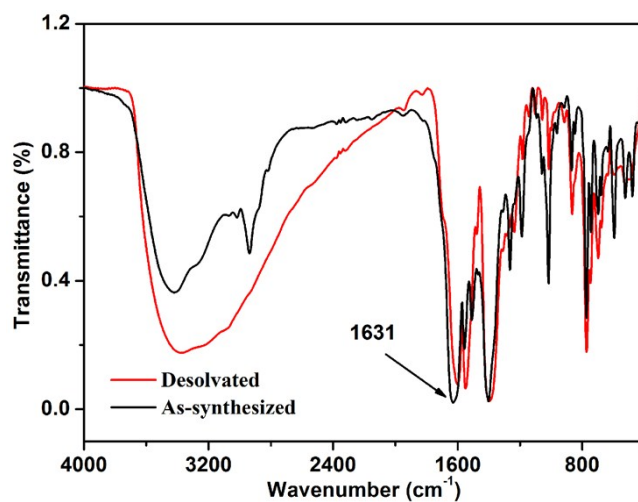

Fig. S4 IR spectra for as-synthesized and desolvated sample of **1**.

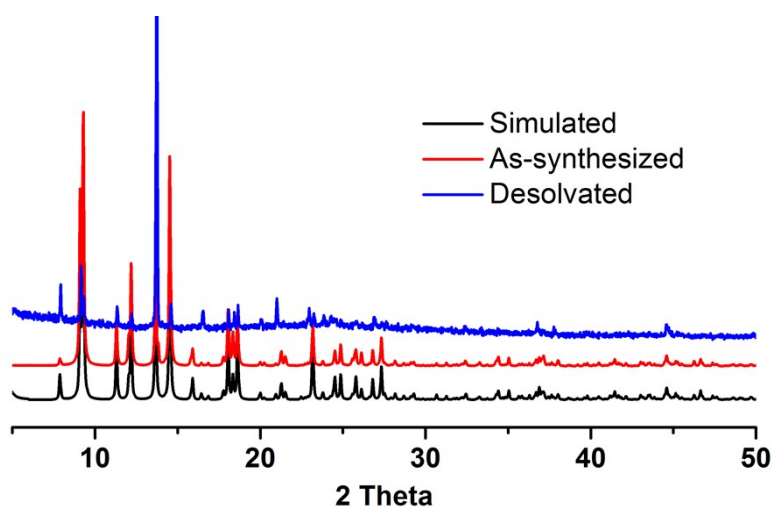

Fig. S5 PXRD patterns of simulated, as-synthesized and desolvated sample of **1**.

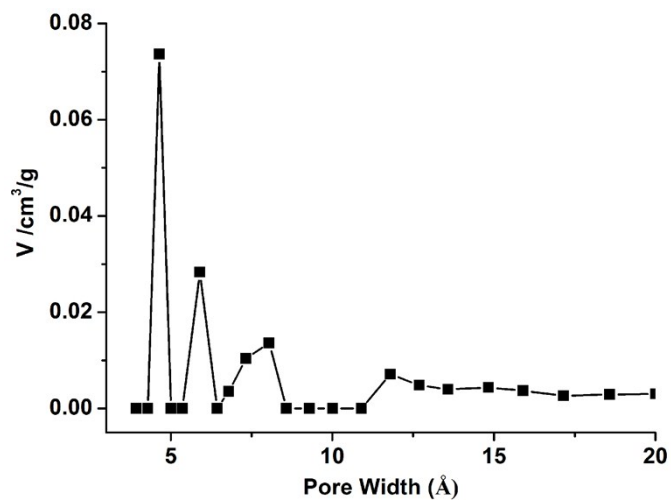

Fig. S6 Incremental surface area as a function of pore width for **1a** calculated from the adsorption branch of 77 K N<sub>2</sub> using the NLDFT model.

### IAST adsorption selectivity calculation:

The experimental isotherm data for pure CO<sub>2</sub> and CH<sub>4</sub> (measured at 298 K) were fitted using a dual Langmuir-Freundlich (L-F) model:

$$q = \frac{a_1 * b_1 * P^{1/c_1}}{1 + b_1 * P^{1/c_1}} + \frac{a_2 * b_2 * P^{1/c_2}}{1 + b_2 * P^{1/c_2}}$$

Where  $q$  and  $p$  are adsorbed amounts and pressures of component  $i$ , respectively.

The adsorption selectivities for binary mixtures of CO<sub>2</sub>/CH<sub>4</sub> and CO<sub>2</sub>/N<sub>2</sub>, defined by

$$S_{ij} = \frac{x_i * y_j}{x_j * y_i}$$

were calculated using the Ideal Adsorption Solution Theory (IAST) of Myers and Prausnitz.

Where  $x_i$  is the mole fraction of component  $i$  in the adsorbed phase and  $y_i$  is the mole fraction of component  $i$  in the bulk.

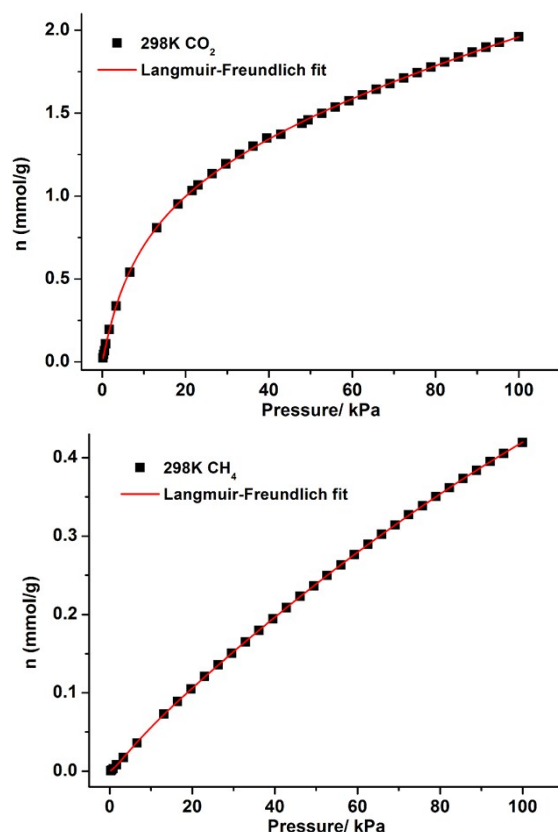

**Fig. S7** CO<sub>2</sub> adsorption isotherms of **1a** with fitting by L-F model:  $a_1 = 16.94769$ ,  $b_1 = 0.00227$ ,  $c_1 = 0.74336$ ,  $a_2 = 0.92357$ ,  $b_2 = 0.10130$ ,  $c_2 = 1.05120$ ,  $\text{Chi}^2 = 3.33396 \times 10^{-5}$ ,  $R^2 = 0.99991$ ; CH<sub>4</sub> adsorption isotherms of **1a** with fitting by L-F model:  $a_1 = 0.05234$ ,  $b_1 = 0.04531$ ,  $c_1 = 1.34452$ ,  $a_2 = 1.09434$ ,  $b_2 = 0.00152$ ,  $c_2 = 1.26334$ ,  $\text{Chi}^2 = 1.62179 \times 10^{-7}$ ,  $R^2 = 0.99999$ .

### Calculation of sorption heat for CO<sub>2</sub> uptake using Virial 2 model

$$\ln P = \ln N + 1/T \sum_{i=0}^m aiN^i + \sum_{i=0}^n biN^i \quad Q_{st} = -R \sum_{i=0}^m aiN^i$$

The above equation was applied to fit the combined CO<sub>2</sub> isotherm data for desolvated **1a** at 273, 285 and 298 K, where  $P$  is the pressure,  $N$  is the adsorbed amount,  $T$  is the temperature,  $ai$  and  $bi$  are virial coefficients, and  $m$  and  $n$  are the number of coefficients used to describe the isotherms.  $Q_{st}$  is the coverage-dependent enthalpy of adsorption and  $R$  is the universal gas constant.

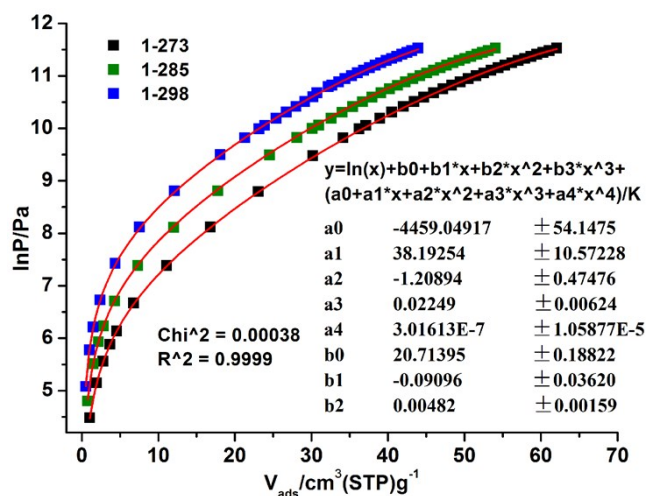

**Fig. S8** Virial analysis of the CO<sub>2</sub> sorption data (273, 285 and 298 K, at 1 atm) for **1a**.

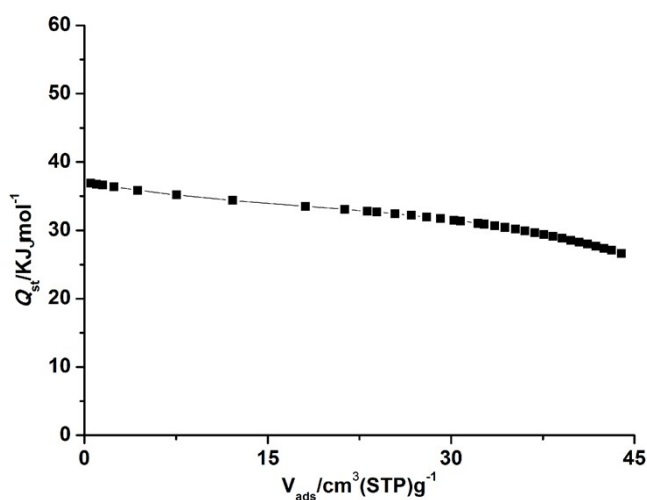

**Fig. S9** Isothermic heat of CO<sub>2</sub> for **1a**.

## GCMC Simulation Methodology

Grand canonical Monte Carlo (GCMC) simulations were performed for the adsorption of CO<sub>2</sub> in **1a** at 298 K by the Sorption module of Material Studio.<sup>1</sup> The framework and CO<sub>2</sub> molecule were considered to be rigid. The partial charges for carbon and oxygen atoms of CO<sub>2</sub> molecules were 0.576e and -0.288e, respectively.<sup>2</sup> The partial charges for atoms of **1a** were derived from QEq method and QEq\_neutral1.0 parameter (Table S2). One unit cell was used during the simulations. The interaction energies between CO<sub>2</sub> and framework were computed through the Coulomb and Lennard-Jones 6-12 (LJ) potentials. All parameters for CO<sub>2</sub> molecule and atoms of **1a** were modeled with the universal forcefield (UFF) embedded in the MS modeling package. A cutoff distance of 12.5 Å was used for LJ interactions, and the Coulombic interactions were calculated by using Ewald summation. For each run, the 5 × 10<sup>6</sup> maximum loading steps and 1 × 10<sup>7</sup> production steps were employed.

## References

- (1) *Accelrys, Materials Studio Getting Started, release 5.0*; Accelrys Software, Inc.: San Diego, CA, 2009.
- (2) A. Hirotsu, K. Mizukami, R. Miura, H. Takaba, T. Miya, A. Fahmi, A. Stirling, M. Kuboand, A. Miyamoto, *Appl. Surf. Sci.*, 1997, **120**, 81–84.

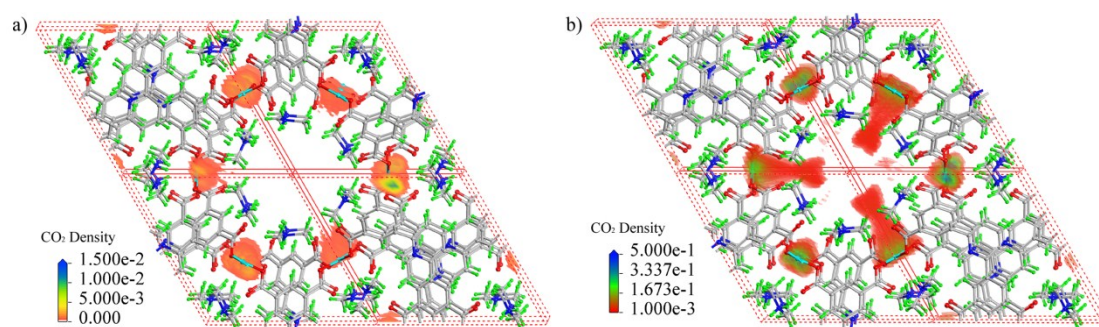

**Fig. S10** Density contours of CO<sub>2</sub> adsorption in the pores of **1a** obtained from GCMC simulations at 298 K under pressure 0.1 kPa (a) and 100 kPa (b), respectively.

**Table S1** Crystal Data and Refinement Results for **1**.

|                                                                                                                |                                                                 |
|----------------------------------------------------------------------------------------------------------------|-----------------------------------------------------------------|
| empirical formula                                                                                              | C <sub>25</sub> H <sub>25</sub> CuN <sub>3</sub> O <sub>8</sub> |
| formula weight                                                                                                 | 559.02                                                          |
| crystal system                                                                                                 | Trigonal                                                        |
| space group                                                                                                    | <i>P</i> 3 <sub>1</sub> 2 <sub>1</sub>                          |
| T (K)                                                                                                          | 296(2)                                                          |
| <i>a</i> (Å)                                                                                                   | 22.4258(16)                                                     |
| <i>b</i> (Å)                                                                                                   | 22.4258(16)                                                     |
| <i>c</i> (Å)                                                                                                   | 10.9190(15)                                                     |
| $\alpha$ (deg)                                                                                                 | 90                                                              |
| $\beta$ (deg)                                                                                                  | 90                                                              |
| $\gamma$ (deg)                                                                                                 | 120                                                             |
| <i>V</i> (Å <sup>3</sup> )                                                                                     | 4755.6(8)                                                       |
| <i>Z</i>                                                                                                       | 6                                                               |
| <i>D<sub>c</sub></i> /g·cm <sup>-3</sup>                                                                       | 1.171                                                           |
| $\mu$ /mm <sup>-1</sup>                                                                                        | 0.732                                                           |
| reflns collected                                                                                               | 25299                                                           |
| reflns unique                                                                                                  | 6211                                                            |
| <i>R</i> (int)                                                                                                 | 0.0400                                                          |
| GOF                                                                                                            | 1.045                                                           |
| <i>R</i> <sub>1</sub> <sup>a</sup> , <i>wR</i> <sub>2</sub> <sup>b</sup> [ <i>I</i> > 2 $\sigma$ ( <i>I</i> )] | 0.0803, 0.2218                                                  |
| <i>R</i> <sub>1</sub> , <i>wR</i> <sub>2</sub> (all data)                                                      | 0.0875, 0.2286                                                  |
| Flack parameter                                                                                                | 0.12(3)                                                         |

$$^a R_1 = \sum ||F_o| - |F_c|| / \sum |F_o|; \quad ^b wR_2 = [\sum w(F_o^2 - F_c^2)^2 / \sum w(F_o^2)^2]^{1/2}$$

**Table S2** The atomic partial charges (e) in **1a**.

|     |            |     |             |      |           |
|-----|------------|-----|-------------|------|-----------|
| Cu1 | 4.09328    | C9  | 0.180654    | H3B  | 0.266463  |
| Cu2 | 4.08499    | C10 | -0.0940951  | H5   | 0.165829  |
| N1  | -0.350699  | C11 | -0.145150   | H7   | 0.134186  |
| N2  | -0.740649  | C12 | -0.135383   | H10  | 0.102208  |
| N3  | -0.771971  | C13 | 0.175235    | H11  | 0.128473  |
| O1  | -0.703096  | C14 | 0.00242796  | H12  | 0.0948875 |
| O2  | -0.686856  | C15 | -0.137768   | H15  | 0.130874  |
| O3  | -0.707388  | C16 | -0.0226645  | H17  | 0.180816  |
| O4  | -0.692748  | C17 | -0.125944   | H19  | 0.105114  |
| O5  | -0.683639  | C18 | -0.00463972 | H22A | 0.198510  |
| O6  | -0.697394  | C19 | -0.172015   | H22B | 0.148480  |
| O7  | -0.694135  | C20 | 0.395671    | H22C | 0.136154  |
| O8  | -0.697622  | C21 | 0.385468    | H23A | 0.172598  |
| C1  | 0.389721   | C22 | -0.403951   | H23B | 0.186650  |
| C2  | -0.0168210 | C23 | -0.444410   | H23C | 0.159782  |
| C3  | -0.178901  | C24 | -0.392220   | H24A | 0.164466  |
| C4  | -0.0249610 | C25 | -0.371810   | H24B | 0.185389  |
| C5  | -0.119213  | H2A | 0.338814    | H24C | 0.143638  |
| C6  | 0.0121158  | H2B | 0.269841    | H25A | 0.159154  |
| C7  | -0.133158  | H3  | 0.128054    | H25B | 0.139772  |
| C8  | 0.388314   | H3A | 0.300550    | H25C | 0.189858  |
